# Supplementary material for: Identifying Novel Glioma-Associated Noncoding RNAs by Their Expression Profiles
Source: Int J Genomics. 2017 Sep 12;2017:2312318. doi: 10.1155/2017/2312318 (PMC5613369; doi:10.1155/2017/2312318)
Supplement: Supplementary file 1 — Table S1. Calculated log2(Fold change) values, obtained by lncRNA profiler using the qPCR method, on the primary set of glioma samples of different, histology-defined subtypes. [file 2312318.f1.xlsx]

## Sheet: Profiling_log2 values
	AC = astrocytoma WHO grade II or III					GBM = glioblastoma multiforme				OAC = oligoastrocytoma			ODG = oligodendroglioma
Gene ID	AC II a	AC II b	AC III a	AC III b	AC III c	primary GBM a	primary GBM b	primary GBM c	primary GBM d	OAC a	OAC b	OAC c	ODG (a)	ODG (b)	ODG (c)	ODG (d)	ODG (e)
21A	0.577249	1.47752	1.25649	0.891231	0.672035	-2.95423	0.641648	0.66376	0.861498	1.30035	0.114958	-0.427326	1.17576	0.908166	-0.148448	-0.221268	-0.31935
7SK	0.00316863	1.01176	-0.128624	-0.105705	1.79431	-0.594707	-0.358773	1.6609	1.33587	-3.79008	-1.47792	0.74159	0.749398	0.175764	0.409153	-1.22239	-0.490573
7SL	0.033376	-0.474505	-1.14203	-0.0824599	0.734971	-1.69741	-0.99076	-2.33607	0.511747	-0.29895	-1.76129	-1.19628	-0.453277	-1.63118	-2.38088	-1.39021	-2.98453
Air	-0.0861069	0.856516	-0.186762	0.419168	-0.0207962	-0.260756	-0.385002	0.707766	-1.52091	0.189853	-1.91702	-1.80586	0.42276	-0.02629	-0.403885	-2.05552	-1.43884
AK023948	-1.58859	-0.385577	-0.5466	-2.81837	-1.31704	-2.35448	-1.28624	-1.32124	-5.01316	-0.330487	-4.29751	-3.54818	-2.84173	-1.61758	-1.95457	-3.16593	-2.6074
Alpha 250	0.19383	2.26067	1.57312	0.523066	-0.176107	-0.190554	0.441319	0.324336	-1.0955	1.84423	-0.890881	-1.22445	0.842549	1.37018	0.0621519	-0.854295	-1.4743
ANRIL	0.981979	1.6899	1.32579	-2.07627	0.0330183	-1.33585	0.189095	-1.02413	-3.27092	-0.538394	-0.643629	-1.81706	-0.525039	-1.06997	-1.40171	-1.23715	-2.98696
antiPeg11	-0.427141	-2.98211	-0.769352	-5.83812	-2.6208	-2.73492	-2.46077	-2.93024	-5.96754	-1.56849	-3.5308	-7.47019	-2.67312	-3.43929	-3.03678	-4.12824	-7.31162
BACE1AS (family)	-0.947753	1.39408	0.00506909	-0.104998	-1.53954	-1.81189	-0.723099	-0.0451808	-2.17127	0.0561466	-0.349288	-1.44857	0.157488	-0.058016	-0.722503	-1.43951	-2.49387
BC200	-0.786586	-2.68231	-0.28542	-2.76057	-3.80182	-3.24458	-1.75822	-2.96201	-4.40546	0.0224222	-3.52449	-1.90961	-1.52885	-3.42065	-2.87905	1.30897	-4.32308
CAR Intergenic 10	0.131012	0.640262	1.48199	0.190678	0.395596	-0.237748	0.256697	-0.421322	-2.5523	1.19789	-2.10155	-2.29326	1.25392	1.42722	-0.611838	-2.50217	-1.37954
DHFR upstream transcripts (family)	-0.207201	-0.340948	0.27397	-2.15344	-0.266875	-0.971684	0.160879	0.175887	-3.84001	-1.03435	-2.43983	-2.41287	-1.21764	-0.991945	-1.5379	-2.18958	-2.13543
Dio3os (family)	-0.042561	0.364334	-0.259989	-1.61038	0.202398	-1.78401	0.546122	-2.51932	-3.43153	-0.674956	-4.05076	-2.97974	-0.361538	-3.29965	-4.28288	-4.35162	-2.35436
DISC2 (family)	-0.0608592	-0.237068	0.0707378	-1.81304	1.59072	-1.36173	2.08775	0.120405	-2.55017	-0.972676	-1.94468	-2.34617	0.777533	-1.65391	-2.29135	-1.2423	-3.45907
EgoA	-0.31198	0.619677	0.827316	-2.46043	1.0054	0.370802	1.19048	0.470862	-5.9993	1.27408	-0.526959	-6.9684	1.14436	0.298179	-1.22142	-4.82058	-7.67917
EGO B	-0.106683	0.715913	0.981176	-2.72692	0.829564	0.00205451	0.398432	-0.377736	-4.1286	1.36038	-1.8052	-3.49289	0.84964	0.280635	-0.293819	-2.63366	-3.66172
Emx2os	-0.388825	0.80806	-0.393346	-2.23184	-0.7745	-1.38137	-0.265264	0.114994	-6.75144	0.12786	-3.02394	-4.42305	-0.362266	-1.24555	-2.02218	-4.69539	-4.48957
GAS5-family	0.55997	1.79925	0.702339	0.748431	0.911191	-1.10445	0.641834	1.48918	-0.778025	0.988393	-1.88041	-0.41147	1.04351	0.281739	0.538521	-0.294123	-1.82579
H19	0.279079	-0.0325984	-0.541819	-2.76321	0.106129	-1.48124	-0.0271116	-0.0691091	-4.08692	0.0918247	-1.35242	-2.54429	1.60118	-0.872752	-2.51718	-2.9762	-3.47307
H19 antisense	-0.26264	0.50776	0.12572	-2.8619	-0.342828	-1.28287	-0.318099	-0.33562	-3.45405	-1.38651	-1.01138	-3.92442	0.317518	-0.140535	-0.559625	-3.4239	-3.68072
H19 upstream conserved 1 & 2	-1.07401	-0.985682	0.423652	-2.71867	-0.728965	-2.49926	-1.25839	-3.08413	-2.85901	0.0773062	-2.39493	-3.61932	-1.57999	-6.55221	-6.77171	-5.2997	-4.64382
HAR1A	0.0133525	0.104425	-0.195343	-3.65611	0.160774	-0.47561	0.0577585	-0.915123	-4.52122	0.15468	-4.16762	-4.1595	-2.31246	-2.71366	-3.14851	-3.57299	-4.02482
HAR1B	0.33268	0.704912	-0.0159782	-4.44867	-0.308146	-0.932024	-0.315311	-2.84308	-6.74552	-0.155637	-7.86329	-8.98476	-2.71583	-0.72317	0.804172	-5.48493	-5.06213
HOTAIR	-0.892175	-0.863113	-0.418943	-0.876015	-1.73251	-2.06225	-0.243312	-2.20323	-3.65169	-0.214341	-3.45629	-2.35756	-0.563785	-4.03914	-3.56579	-3.67664	-1.76459
HOTAIRM1	0.458446	0.506558	0.127617	-1.76034	1.231	0.0890743	0.641005	0.632021	-2.59232	1.21826	-1.42991	-3.11648	1.57431	-1.63875	-1.23913	-3.74831	-2.18351
HOTTIP	-1.29639	0.554226	-0.718684	-5.3336	-1.1939	-1.02212	-0.781867	-0.0636146	-5.85502	0.907606	-3.31053	-5.58103	-0.354771	-1.95699	-1.86589	-5.34918	-4.74338
Hoxa11as	-0.705909	-1.44435	-0.46713	-1.07944	0.158757	-0.931804	-0.359353	-7.67163	-2.97783	0.404452	-3.55244	-3.01529	-0.265095	-1.2647	-1.7206	-3.29124	-4.55398
HOXA3as	-0.816371	1.26296	-0.351992	-6.78799	1.11816	-0.297985	1.44463	-0.5144	-3.30714	0.34851	-2.37415	-6.44819	0.274662	-0.0117743	-0.987009	-5.27626	-5.0916
HULC	-0.128199	0.863258	0.312271	-0.10114	-0.133793	0.190421	0.692098	1.60778	-2.6158	1.24197	-5.34825	-2.39637	1.28489	0.56831	0.114575	-1.23096	-3.26917
IGF2AS (family)	-0.531473	-1.07957	-0.0169501	-0.309665	0.283533	-4.02088	-0.189564	-0.777034	-2.18352	-0.661812	-3.65928	-3.31016	-0.0822691	-0.262848	-1.3778	-3.84247	-2.73658
IPW	-0.747807	0.180275	-0.513121	-2.97132	-0.415073	-2.76605	-0.182317	-1.24493	-5.43547	-2.84551	-4.15962	-2.41822	-0.489356	0.00337869	-1.14177	-4.93527	-3.78158
Jpx	-0.145563	-1.00247	-1.27099	-2.16414	-0.176405	-2.34313	0.422289	0.706817	-3.18252	0.117363	-5.0832	-2.98867	-0.794044	-6.23949	-4.46359	-4.02898	-5.46354
Kcnq1ot1	-0.286527	-0.323	-4.28363	-2.60308	-0.608915	-2.86818	-0.395061	0.287455	-2.77926	-1.98214	-4.1433	-1.9064	-1.28107	-3.15604	-2.80219	-2.74394	-4.22644
KRASP1	0.480388	0.803327	-1.78153	-2.86098	0.210878	-0.774422	0.105106	-1.71759	-8.10766	1.33167	-7.4735	-7.67209	-3.47334	-2.26827	-2.85665	-5.62942	-6.95201
lincRNA-p21	-0.932315	0.770794	0.64349	-0.773702	0.292354	-0.476458	-0.348327	-0.743912	-2.71436	0.500845	-1.2117	-4.52304	-0.0214751	-1.09765	-0.963755	-0.987374	-3.21014
lincRNA-RoR	-1.93218	-0.791985	-1.74834	-4.99666	-0.671916	-1.74794	-0.629916	-3.04762	-3.55464	-0.61289	-3.32539	-2.14092	-0.537826	-1.45227	-2.35825	-3.63573	-4.28723
lincRNA-VLDLR	-1.06416	-0.911152	-1.50244	-2.19858	-0.976617	-2.22014	-0.27203	-2.34031	-1.84252	0.549471	-3.74942	-1.88999	-1.55412	-1.62078	-2.06528	-1.84118	-1.82005
LUST	0.154795	1.46741	1.14797	0.945424	0.436809	-0.655	0.936457	2.21702	-0.888095	1.18697	-3.42114	-0.655667	0.769829	1.36763	1.33532	-0.80528	-2.27324
Malat1	-0.056547	0.0912952	-0.921489	1.25925	-0.185384	-2.66205	0.333752	1.23752	-2.52423	-0.245228	-2.63547	-0.584695	-0.719371	0.290471	-0.0417528	0.743143	-3.81634
mascRNA	-0.654656	-1.05991	-0.797176	-1.11202	-0.757214	-3.06354	-0.205498	-2.26093	-2.41822	-2.62016	-3.15309	-1.09712	-1.34742	-1.00636	-2.48039	-2.569	-2.2625
MEG3 (family)	-0.814545	-2.65882	-2.84814	-3.36795	-1.1296	-3.17872	-1.54534	-3.2625	-4.92603	-1.99612	-4.84366	-4.46651	-3.4107	-6.33167	-5.2809	-2.83485	-2.93973
MEG9	-0.0189899	-1.31104	0.196707	-3.79913	-0.112326	-0.691103	-0.563118	0.166714	-3.64146	0.109782	-4.7143	-2.86895	-1.39938	-5.08939	-3.41273	-5.02085	-7.24035
MER11C	0.154706	0.0296666	-1.68937	-2.05171	0.855963	-0.808571	-0.344361	-4.07972	-5.66132	0.930406	-5.85353	-3.95855	-3.78902	-5.14748	-2.6728	-2.52611	-3.02064
ncR-uPAR	1.01368	0.985922	-0.0733747	-1.91797	-0.00771852	-1.53125	0.829816	0.352862	-4.15681	1.15529	-4.98711	-3.01772	0.969708	-3.5804	-1.007	-2.49303	-2.54575
NDM29	-2.11652	0.262287	0.248677	-1.75451	0.630204	-1.20368	0.64397	-2.07273	-2.69613	-0.228827	0.114241	-3.66608	-0.14318	-1.24706	-0.746471	-3.04198	-3.23617
NEAT1 (family)	-3.33993	-2.92731	-1.9688	-6.1847	-3.37235	-3.05361	-2.41296	-2.50086	-7.70517	-2.76374	-6.05461	-9.38482	-2.70289	-4.32896	-3.75678	-8.0962	-8.59591
Nespas	0.275007	1.13643	1.3004	-0.112475	0.575312	0.356144	1.56071	-0.305788	-2.17788	1.45418	-2.27928	-2.39593	1.0072	-0.104697	-1.72738	-3.08314	-2.80591
NRON	-1.33808	0.67709	-1.50208	-4.39111	-1.39692	-2.13397	-1.05253	-1.41874	-4.6682	-0.13999	-2.83391	-5.40076	-1.98938	-0.97568	-3.61784	-4.71254	-5.6001
NTT	-0.823499	-2.45271	0.850335	-1.78136	0.201331	-0.944411	0.512437	-0.65327	-2.29312	0.449083	-3.12817	-1.15664	0.717741	-0.0414015	-0.93716	-3.34456	-3.05572
p53 mRNA	2.12677	0.0901954	0.250962	1.5509	1.61353	0.695994	3.11103	3.60881	1.42223	3.17473	-3.12029	2.34483	2.79077	-0.0846703	1.31034	1.81558	1.62761
PCGEM1	-1.355	-1.27697	-1.36502	-1.91653	-2.16135	-4.41236	-0.358477	-2.21072	-4.69511	-1.19867	-3.55312	-1.45664	-1.18304	-1.2539	-2.7014	-1.13897	-0.740299
PRINS	-0.254277	-1.34294	-1.85867	-2.67245	-0.523071	-2.85475	0.363359	-1.42388	-1.78189	0.146343	-5.26014	-1.92759	-2.38303	-4.74855	-5.8451	-4.28342	-2.69817
PSF inhibiting RNA	-1.11716	-2.4897	-0.459601	-3.67669	-1.0145	-2.75633	-0.011588	-1.16488	-4.00462	-1.93236	-5.52616	-1.4112	-0.628162	-3.64386	-2.75633	-2.04692	-3.1078
RNCR3	-0.179709	0.193005	-1.0802	-0.450108	-0.672985	-1.68808	0.671608	-1.02007	-2.38317	0.194547	-4.12868	-2.41761	0.171576	-3.14325	-1.80393	-2.03953	-2.46932
SAF	-1.09108	-0.787014	-1.19609	-1.46432	-0.644323	-1.33227	0.476271	-4.2166	-2.33267	1.80342	-3.20116	-1.4191	-0.5215	-4.9356	-1.50794	-2.09064	-2.2441
SCA8	-3.63874	-1.44187	-1.8103	-1.98673	-2.77414	-3.90795	-3.20715	-3.55842	-4.52274	-3.60721	-6.27459	-6.19987	-3.30841	-2.89053	-2.60281	-5.56322	-7.52336
SNHG1	-0.109904	0.186762	-1.95431	-3.59396	-0.0358292	-1.42017	0.492691	0.181279	-3.05456	-0.426926	-4.50191	-2.05397	-2.17894	-3.25742	-4.96226	-2.35308	-7.59325
SNHG3	0.572793	-2.36101	-0.887349	-0.836409	0.711503	-0.53582	0.491952	-1.91472	-3.03936	-0.0529245	-1.67475	-0.761588	0.700262	-0.56907	-0.619859	-1.13468	-0.703332
SNHG5	1.48823	1.70878	-0.243147	1.40203	-0.366769	-0.819916	0.966554	0.285501	-0.791909	1.49379	-1.00257	0.980928	1.19976	1.4235	0.919548	2.01528	0.208988
SNHG6	-0.320019	-0.385526	-0.979153	-2.68776	-1.44444	-3.16045	-0.400434	-1.41985	-2.19187	-0.211008	-2.50756	-2.7686	-1.84914	-1.05981	-1.02825	-2.25431	-5.66896
Sox2ot	-0.137753	0.892491	-0.763557	-1.21126	-0.472348	-5.06443	-0.108508	-2.77883	-2.65682	0.899933	-3.01345	-1.57895	-2.02097	-1.47792	-1.67229	-1.89186	-3.31334
ST7OT	-2.63489	-2.98024	-2.55406	-1.33151	-2.80212	-4.87164	-3.20168	-8.11779	-7.18728	-1.22805	-5.32933	-5.91849	-4.7495	-2.25024	-3.79099	-2.6874	-4.60957
TEA ncRNAs (family)	-0.986187	-0.0779604	-2.65375	-2.46641	-2.11136	-2.17109	-0.439906	-4.07968	-4.48129	-0.0184763	-6.47349	-3.33757	-0.735338	-3.88577	-3.38607	-2.49693	-3.33626
Tmevpg1	-0.0320922	1.15704	-0.821239	0.0965769	0.098875	-0.860491	0.711549	-2.38112	-1.14744	1.66279	-3.16769	-0.695023	-0.737117	-2.54514	0.548075	-0.0155186	-1.40051
TncRNA	-0.227893	0.62181	-1.08689	0.0747689	-0.352165	-0.996612	0.13381	1.80602	-1.64022	-0.42215	-5.43842	-1.09823	-0.763779	-1.7397	-2.0568	-1.59002	-1.99283
Tsix	-0.673849	0.881378	-0.948388	-0.467651	-0.906212	-0.583326	-1.0304	-1.98229	2.01444	0.949874	-2.21258	-0.769259	-0.816606	0.4243	-0.541991	-1.92945	-0.758756
TUG1 (family)	-1.07427	-0.841771	-0.953084	-4.1338	-2.4008	-2.72727	-0.415125	-1.10205	-3.33044	-0.0547411	-6.1998	-0.393155	-1.39066	-1.09521	-3.28721	-0.822522	-1.58035
UCA1	0.71901	-1.85695	-1.49692	-0.567837	1.36982	0.414089	1.81736	-1.41982	-2.29434	0.630086	-3.98947	0.839366	1.54502	-0.522512	-0.842581	-1.50266	-0.8045
UM9-5	0.158637	-0.952758	0.245722	1.25259	-0.198225	0.121619	0.953251	-0.118823	-0.506254	1.41253	-2.93914	0.554655	0.434244	0.0265715	0.286797	0.868761	-1.33968
Xist	-0.909779	0.823103	0.486459	-0.163775	-0.584622	-2.94117	0.881559	-1.20724	-3.40838	-1.21951	-5.06646	-1.27401	-1.09245	-0.442223	-0.844691	-2.72506	-2.12689
Y RNA-1	-2.67468	-1.53364	-1.57411	-0.956215	-1.60343	-4.5072	-1.64819	-3.31621	-0.613955	-1.21586	-3.63922	-0.737826	-2.62397	-1.55572	-2.2283	-1.85485	-1.66774
Zeb2NAT	0.190495	0.682753	0.122952	0.362816	0.521476	-0.906004	-0.939904	0.00505291	-0.294148	-1.11729	-1.56337	0.843223	0.150643	-0.0495343	-0.336362	0.0191039	-2.85682
Zfas1	1.99052	0.368929	-0.729395	0.804543	0.414098	-0.319128	-0.514938	-2.0404	-2.01743	0.372048	-2.66231	-2.21055	0.0275846	-1.53932	1.06144	0.857123	-1.04766
Zfhx2as	-0.811812	-2.90037	-2.29845	0.343699	-0.0501652	-1.32691	0.133005	-2.6397	-1.1489	-0.304906	-3.76379	-1.29812	0.0893611	-2.66147	-2.2654	-1.04873	-1.65374
